# Supplementary material
Source: HighWire-hosted journal article supplement (https://svn.bmj.com/content/svn-2023-002788)

## Supplemental Material

### „ Therapy practice of vasospasm during endovascular stroke treatment (EVT)“

An International anonymous online survey for neurointerventionalists

#### **Subgroup Analysis of survey respondents who treated >200 stroke patients**

Study Groups according to the answer to Question 15 (Q15):

Study Group 1: considered vasospasm as a complication potentially influencing the patient's outcome

Study Group 2: did not consider vasospasm as a complication potentially influencing the patient's outcome

Q1: How many years of experience concerning endovascular stroke treatment do you have?

|               | < 1 year |   | 1-5 years |    | 5-10 years |    | > 10 years |     | Total           |            |
|---------------|----------|---|-----------|----|------------|----|------------|-----|-----------------|------------|
| Study Group 1 | 0,00%    | 0 | 8,13%     | 10 | 29,27%     | 36 | 62,60%     | 77  | 45,05%          | 123        |
| Study Group 2 | 0,00%    | 0 | 9,33%     | 14 | 30,67%     | 46 | 60,00%     | 90  | 54,95%          | 150        |
| Total         | 0,00%    | 0 | 8,79%     | 24 | 30,04%     | 82 | 61,17%     | 167 | 100,00%         | 273        |
|               |          |   |           |    |            |    |            |     | <b>Answered</b> | <b>273</b> |
|               |          |   |           |    |            |    |            |     | <b>Skipped</b>  | <b>0</b>   |

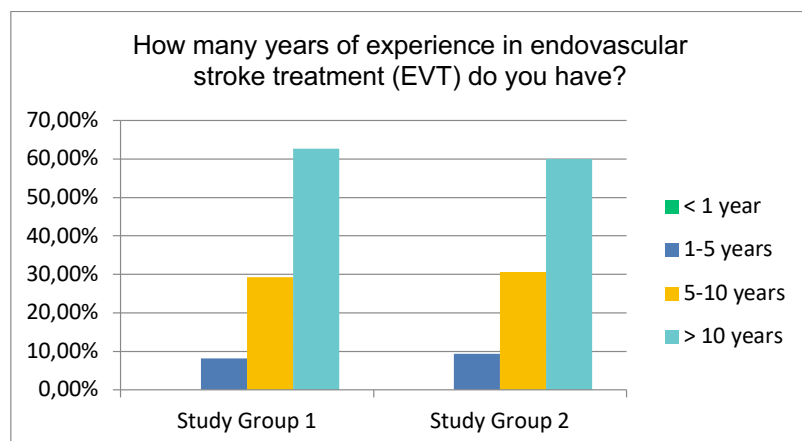

Q6: What is your gender?

|               | male   |     | female |    | diverse/other |   | Total           |            |
|---------------|--------|-----|--------|----|---------------|---|-----------------|------------|
| Study Group 1 | 80,17% | 97  | 19,83% | 24 | 0,00%         | 0 | 44,81%          | 121        |
| Study Group 2 | 72,48% | 108 | 26,17% | 39 | 1,34%         | 2 | 55,19%          | 149        |
| Total         | 75,93% | 205 | 23,33% | 63 | 0,74%         | 2 | 100,00%         | 270        |
|               |        |     |        |    |               |   | <b>Answered</b> | <b>270</b> |
|               |        |     |        |    |               |   | <b>Skipped</b>  | <b>3</b>   |

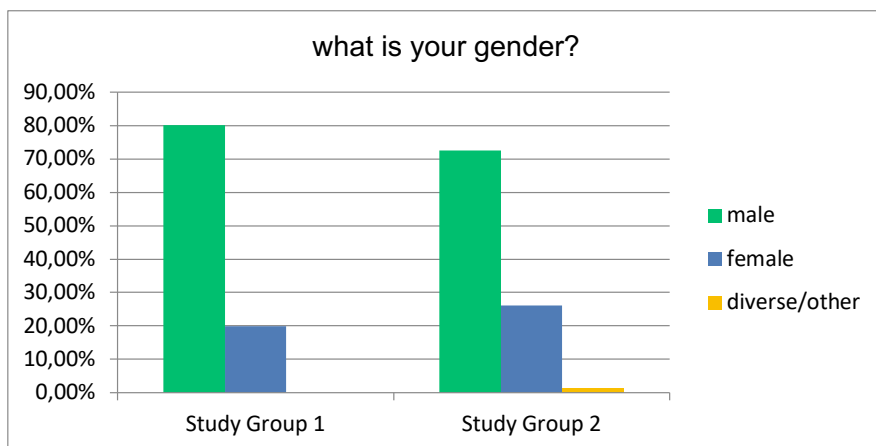

Q7: Do you routinely give vasodilator (such as calcium channel blockers) during EVT to prevent vasospasm and if so, to which catheter flush do you add it?

|               | No, I do not routinely add a vasodilator to any flush during EVT |     | Guide catheter flush |    | Intermediate catheter flush |    | Microcatheter flush |   | Total           |            |
|---------------|------------------------------------------------------------------|-----|----------------------|----|-----------------------------|----|---------------------|---|-----------------|------------|
| Study Group 1 | 60,98%                                                           | 75  | 24,39%               | 30 | 12,20%                      | 15 | 2,44%               | 3 | 45,05%          | 123        |
| Study Group 2 | 66,00%                                                           | 99  | 24,00%               | 36 | 7,33%                       | 11 | 2,67%               | 4 | 54,95%          | 150        |
| Total         | 63,74%                                                           | 174 | 24,18%               | 66 | 9,52%                       | 26 | 2,56%               | 7 | 100,00%         | 273        |
|               |                                                                  |     |                      |    |                             |    |                     |   | <b>Answered</b> | <b>273</b> |
|               |                                                                  |     |                      |    |                             |    |                     |   | <b>Skipped</b>  | <b>0</b>   |

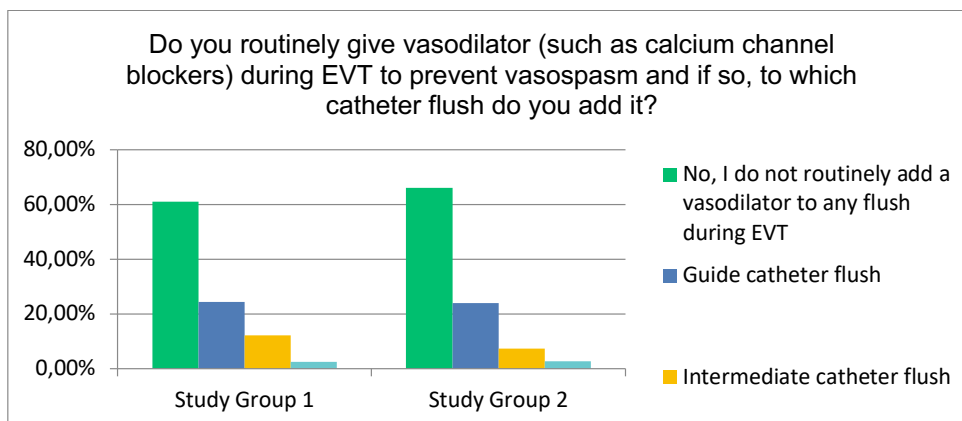

Q8: If yes in Q7, which vasodilator do you normally use for the treatment of vasospasm during EVT?

|               | Nimodipine |    | Milrinone |   | Verapamil |    | Papaverin |   | Other (please specify) |    | Total           |            |
|---------------|------------|----|-----------|---|-----------|----|-----------|---|------------------------|----|-----------------|------------|
| Study Group 1 | 70,59%     | 48 | 2,94%     | 2 | 14,71%    | 10 | 5,88%     | 4 | 5,88%                  | 4  | 51,13%          | 68         |
| Study Group 2 | 69,23%     | 45 | 4,62%     | 3 | 10,77%    | 7  | 3,08%     | 2 | 12,31%                 | 8  | 48,87%          | 65         |
| Total         | 69,92%     | 93 | 3,76%     | 5 | 12,78%    | 17 | 4,51%     | 6 | 9,02%                  | 12 | 100,00%         | 133        |
|               |            |    |           |   |           |    |           |   |                        |    | <b>Answered</b> | <b>133</b> |
|               |            |    |           |   |           |    |           |   |                        |    | <b>Skipped</b>  | <b>140</b> |

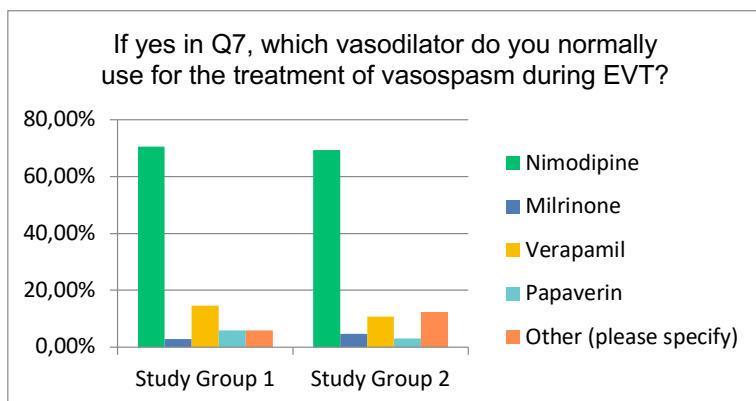

Q10: How often do you detect moderate to severe intracranial vasospasms during EVT for the treatment of large vessel occlusion stroke, approximately?

|               | < 5 %  |     | 5 - 10 % |    | 10 - 15 % |    | 15 - 20 % |    | > 20 % |    | Total           |     |
|---------------|--------|-----|----------|----|-----------|----|-----------|----|--------|----|-----------------|-----|
| Study Group 1 | 43,33% | 52  | 31,67%   | 38 | 13,33%    | 16 | 6,67%     | 8  | 5,00%  | 6  | 44,78%          | 120 |
| Study Group 2 | 46,62% | 69  | 22,30%   | 33 | 10,81%    | 16 | 14,19%    | 21 | 6,08%  | 9  | 55,22%          | 148 |
| Total         | 45,15% | 121 | 26,49%   | 71 | 11,94%    | 32 | 10,82%    | 29 | 5,60%  | 15 | 100,00%         | 268 |
|               |        |     |          |    |           |    |           |    |        |    | <b>Answered</b> | 268 |
|               |        |     |          |    |           |    |           |    |        |    | <b>Skipped</b>  | 5   |

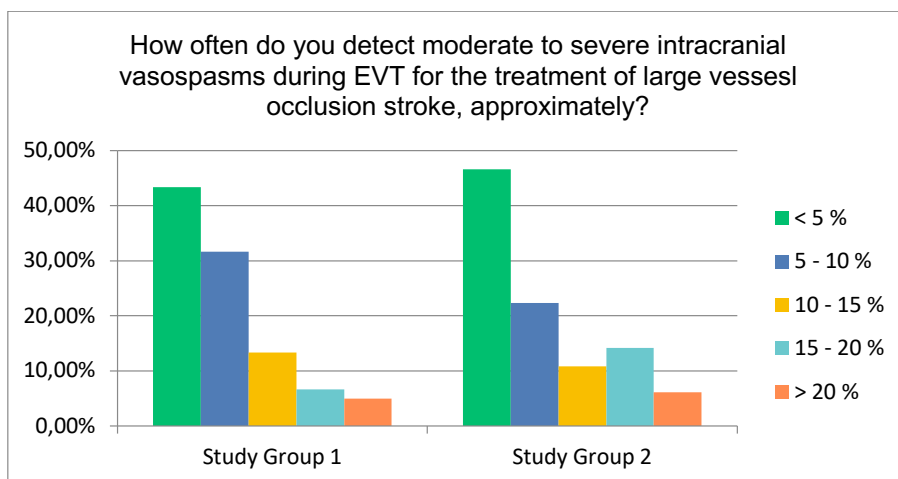

Q11: If you detect the following vasospasm during EVT after your thrombectomy pass (i.e. stent retriever and/or aspiration catheter already retrieved), would you treat it?

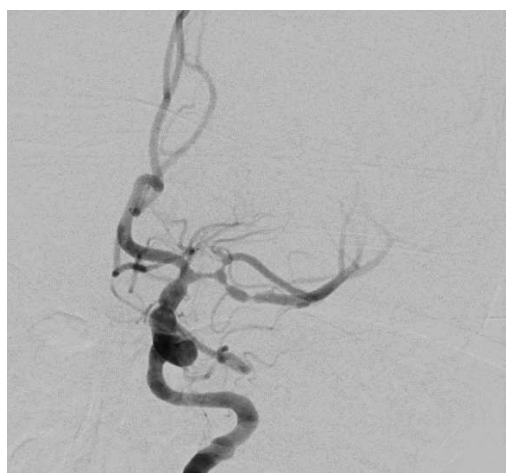

|               | no     |    | if yes, how much milligram of which vasodilator would you give over how many minutes? |     | Total           |            |
|---------------|--------|----|---------------------------------------------------------------------------------------|-----|-----------------|------------|
|               | %      | n  | %                                                                                     | n   | %               | n          |
| Study Group 1 | 18,70% | 23 | 81,30%                                                                                | 100 | 45,05%          | 123        |
| Study Group 2 | 38,00% | 57 | 62,00%                                                                                | 93  | 54,95%          | 150        |
| Total         | 29,30% | 80 | 70,70%                                                                                | 193 | 100,00%         | 273        |
|               |        |    |                                                                                       |     | <b>Answered</b> | <b>273</b> |
|               |        |    |                                                                                       |     | <b>Skipped</b>  | <b>0</b>   |

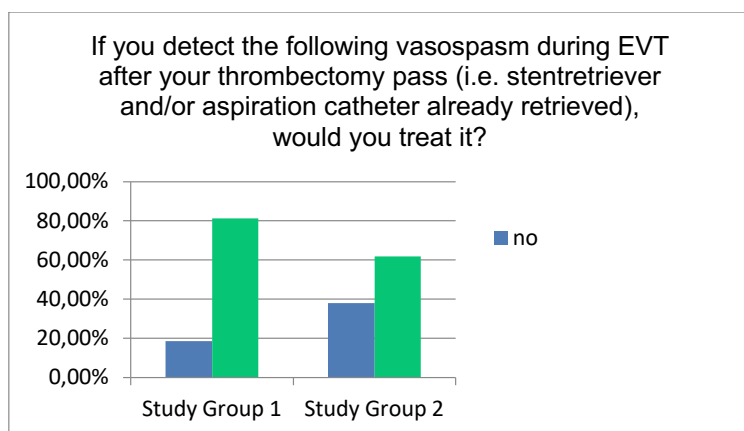

Q12: Do you continue with EVT in case of residual and reachable medium vessel occlusion (MeVO), when you observe a proximal vasospasm such as shown in Q11?

|               | Yes, I would continue immediately without treatment of the vasospasm |    | Yes, I would continue immediately but after I have initiated therapy with a vasodilator |    | Yes, I would continue but first wait until the vasospasm regressed substantially after giving a vasodilator |     | No, I wait until vasospasm has regressed spontaneously and then reassess |    | Total   |     |
|---------------|----------------------------------------------------------------------|----|-----------------------------------------------------------------------------------------|----|-------------------------------------------------------------------------------------------------------------|-----|--------------------------------------------------------------------------|----|---------|-----|
|               | %                                                                    | n  | %                                                                                       | n  | %                                                                                                           | n   | %                                                                        | n  | %       | n   |
| Study Group 1 | 8,13%                                                                | 10 | 31,71%                                                                                  | 39 | 49,59%                                                                                                      | 61  | 10,57%                                                                   | 13 | 45,22%  | 123 |
| Study Group 2 | 27,52%                                                               | 41 | 31,54%                                                                                  | 47 | 27,52%                                                                                                      | 41  | 13,42%                                                                   | 20 | 54,78%  | 149 |
| Total         | 18,75%                                                               | 51 | 31,62%                                                                                  | 86 | 37,50%                                                                                                      | 102 | 12,13%                                                                   | 33 | 100,00% | 272 |

|  |  |  |  |  |  |  |  |  |                 |            |
|--|--|--|--|--|--|--|--|--|-----------------|------------|
|  |  |  |  |  |  |  |  |  | <b>Answered</b> | <b>272</b> |
|  |  |  |  |  |  |  |  |  | <b>Skipped</b>  | <b>1</b>   |

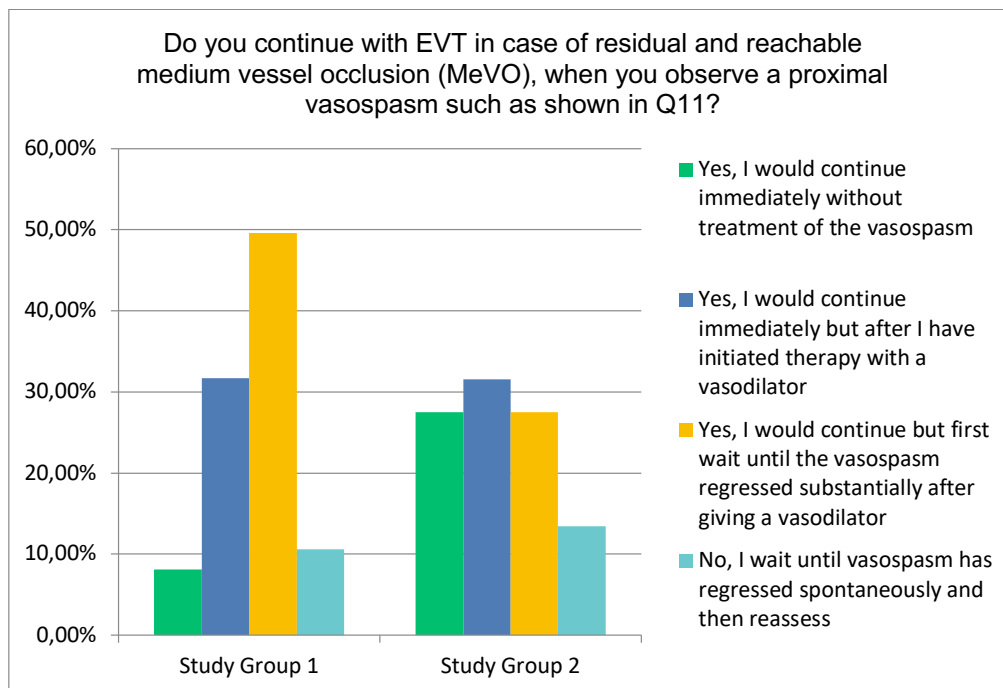

**Q13: You perform an excellent (TICI 3) EVT for M1-occlusion with one pass only! Congratulations! After your successful thrombectomy pass you observe a vasospasm such as shown in Q11. How do you react?**

|               | I withdraw the remaining material. My job is done here. |    | I treat the vasospasm with a vasodilator but without further imaging |    | I treat the vasospasm with a vasodilator and confirm with further DSA imaging that it resolved |     | Other (please specify) |    | Total           |            |
|---------------|---------------------------------------------------------|----|----------------------------------------------------------------------|----|------------------------------------------------------------------------------------------------|-----|------------------------|----|-----------------|------------|
| Study Group 1 | 8,13%                                                   | 10 | 9,76%                                                                | 12 | 76,42%                                                                                         | 94  | 5,69%                  | 7  | 45,05%          | 123        |
| Study Group 2 | 32,67%                                                  | 49 | 7,33%                                                                | 11 | 47,33%                                                                                         | 71  | 12,67%                 | 19 | 54,95%          | 150        |
| Total         | 21,61%                                                  | 59 | 8,42%                                                                | 23 | 60,44%                                                                                         | 165 | 9,52%                  | 26 | 100,00%         | 273        |
|               |                                                         |    |                                                                      |    |                                                                                                |     |                        |    | <b>Answered</b> | <b>273</b> |
|               |                                                         |    |                                                                      |    |                                                                                                |     |                        |    | <b>Skipped</b>  | <b>0</b>   |

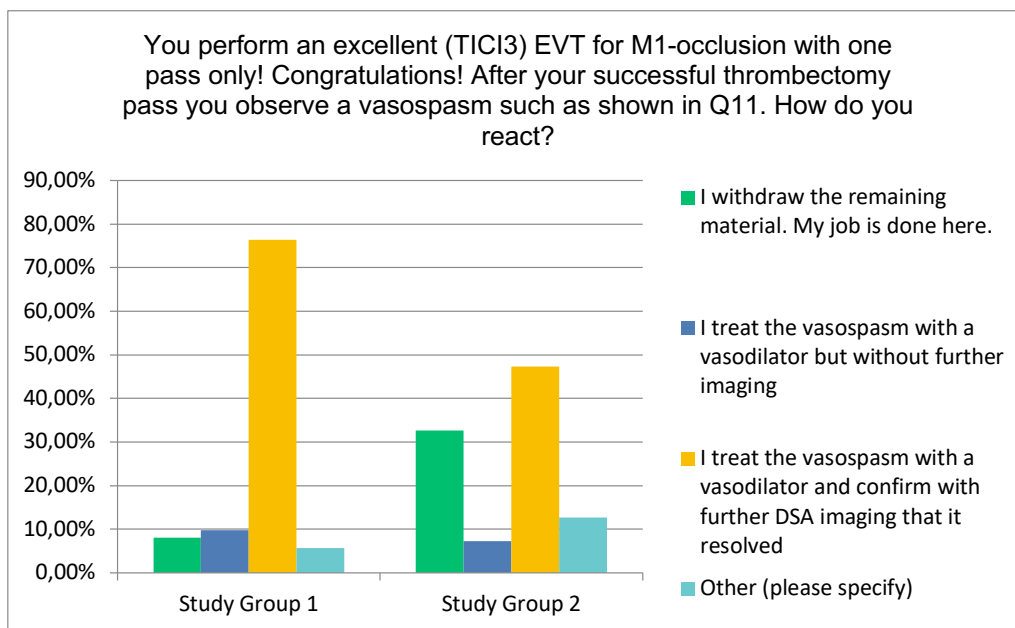

Q14: If you detect the following vasospasm during EVT after your thrombectomy pass, would you treat it?

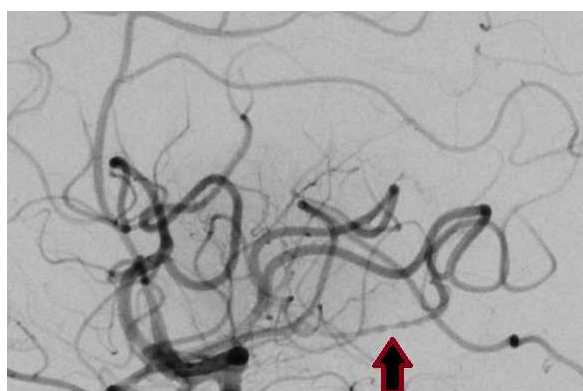

|               | No     |     | If yes, how much milligram of which vasodilator would you give over how many minutes? |    | Total           |            |
|---------------|--------|-----|---------------------------------------------------------------------------------------|----|-----------------|------------|
|               | %      | n   | %                                                                                     | n  | %               | n          |
| Study Group 1 | 71,54% | 88  | 28,46%                                                                                | 35 | 45,39%          | 123        |
| Study Group 2 | 85,81% | 127 | 14,19%                                                                                | 21 | 54,61%          | 148        |
| Total         | 79,34% | 215 | 20,66%                                                                                | 56 | 100,00%         | 271        |
|               |        |     |                                                                                       |    | <b>Answered</b> | <b>271</b> |
|               |        |     |                                                                                       |    | <b>Skipped</b>  | <b>2</b>   |

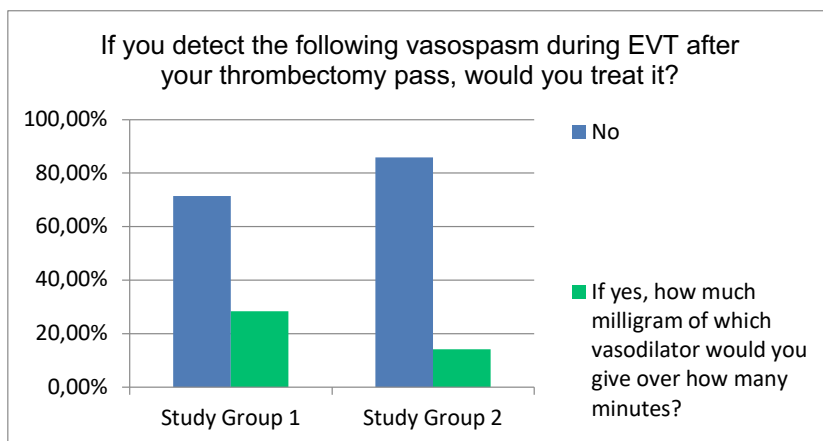

Q15: Do you consider intracranial vasospasm to be a complication that potentially influences the patient’s outcome?

|          | Yes     |     | No      |     | Total           |            |
|----------|---------|-----|---------|-----|-----------------|------------|
| Q15: Yes | 100,00% | 123 | 0,00%   | 0   | 45,05%          | 123        |
| Q15: No  | 0,00%   | 0   | 100,00% | 150 | 54,95%          | 150        |
| Total    | 45,05%  | 123 | 54,95%  | 150 | 100,00%         | 273        |
|          |         |     |         |     | <b>Answered</b> | <b>273</b> |
|          |         |     |         |     | <b>Skipped</b>  | <b>0</b>   |

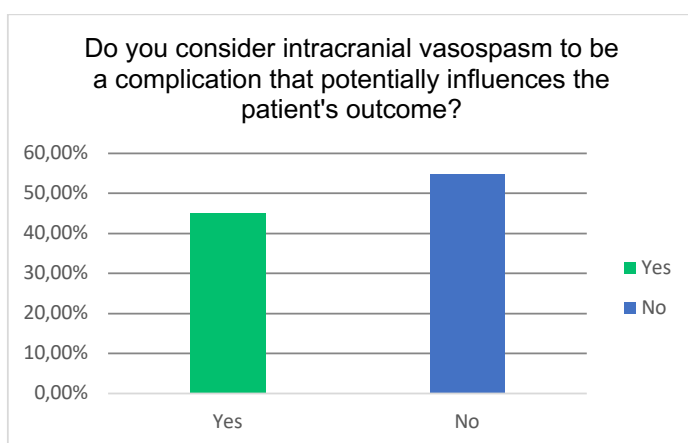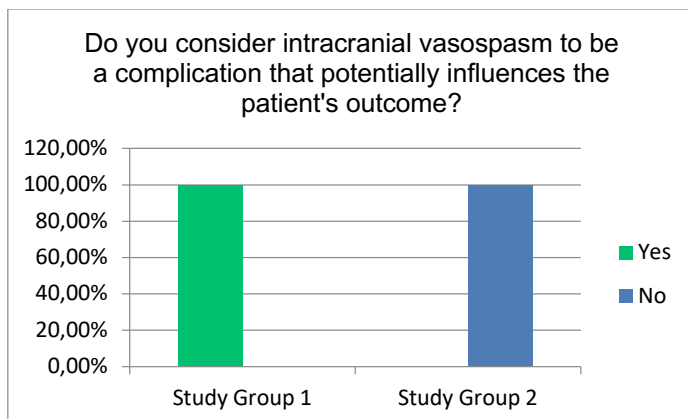

Q16: Would you treat this extracranial vasospasm (>85% vessel diameter reduction, but no hemodynamic impairment of blood flow)?

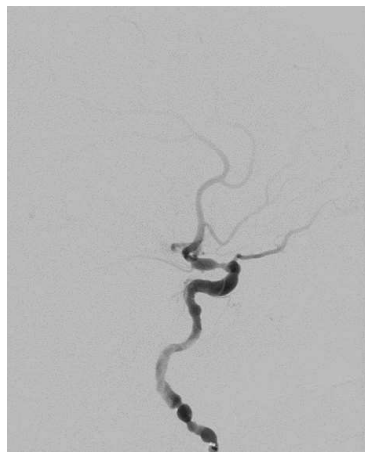

|               | Yes    |     | No     |     | Total           |            |
|---------------|--------|-----|--------|-----|-----------------|------------|
|               | %      | n   | %      | n   | %               | n          |
| Study Group 1 | 64,23% | 79  | 35,77% | 44  | 45,22%          | 123        |
| Study Group 2 | 36,91% | 55  | 63,09% | 94  | 54,78%          | 149        |
| Total         | 49,26% | 134 | 50,74% | 138 | 100,00%         | 272        |
|               |        |     |        |     | <b>Answered</b> | <b>272</b> |
|               |        |     |        |     | <b>Skipped</b>  | <b>1</b>   |

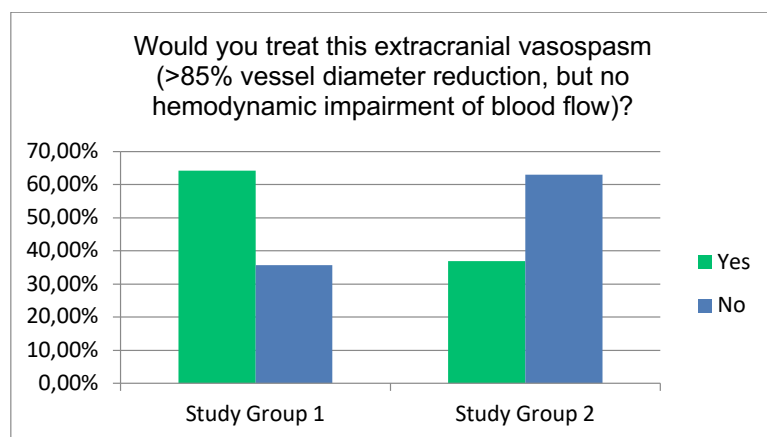

Q17: What do you consider as a relevant contraindication to medically treat vasospasm (with vasodilator) during EVT? (>1 answer possible)

|               | None of the above |    | prolonged intervention time |    | suspected extended infarction |    | severe systemic hypotension |     | bradycardia |    | Other (please specify) |    | Total   |     |
|---------------|-------------------|----|-----------------------------|----|-------------------------------|----|-----------------------------|-----|-------------|----|------------------------|----|---------|-----|
|               | %                 | n  | %                           | n  | %                             | n  | %                           | n   | %           | n  | %                      | n  | %       | n   |
| Study Group 1 | 18,70%            | 23 | 17,07%                      | 21 | 25,20%                        | 31 | 62,60%                      | 77  | 14,63%      | 18 | 4,88%                  | 6  | 45,22%  | 123 |
| Study Group 2 | 25,50%            | 38 | 9,40%                       | 14 | 19,46%                        | 29 | 59,06%                      | 88  | 19,46%      | 29 | 5,37%                  | 8  | 54,78%  | 149 |
| Total         | 22,43%            | 61 | 12,87%                      | 35 | 22,06%                        | 60 | 60,66%                      | 165 | 17,28%      | 47 | 5,15%                  | 14 | 100,00% | 272 |



|  |  |  |  |  |  |  |  |  |  |  |  |  |  |  |  |  |                 |            |
|--|--|--|--|--|--|--|--|--|--|--|--|--|--|--|--|--|-----------------|------------|
|  |  |  |  |  |  |  |  |  |  |  |  |  |  |  |  |  | <b>Answered</b> | <b>272</b> |
|  |  |  |  |  |  |  |  |  |  |  |  |  |  |  |  |  | <b>Skipped</b>  | <b>1</b>   |

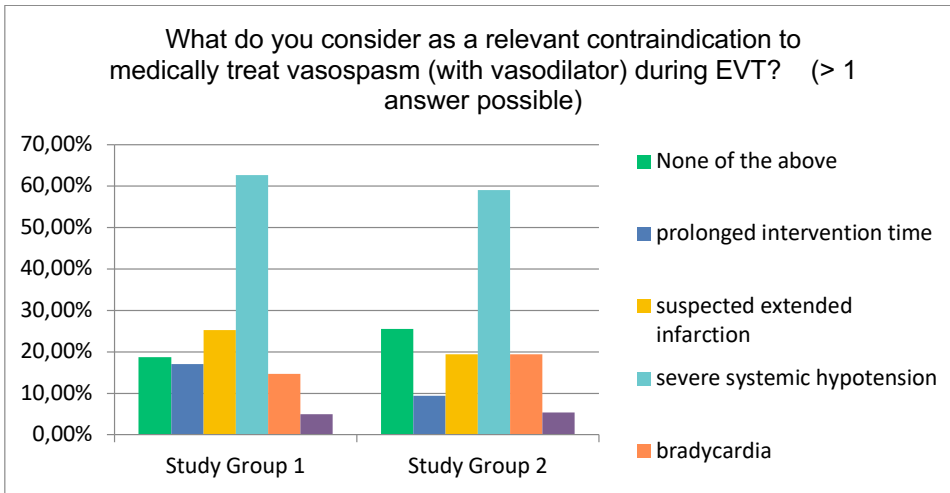

Q18: Does a standard operating procedure (SOP) exist at your facility on treating vasospasm during EVT?

|               | Yes    |    | No     |     | Total           |            |
|---------------|--------|----|--------|-----|-----------------|------------|
| Study Group 1 | 35,77% | 44 | 64,23% | 79  | 45,22%          | 123        |
| Study Group 2 | 14,09% | 21 | 85,91% | 128 | 54,78%          | 149        |
| Total         | 23,90% | 65 | 76,10% | 207 | 100,00%         | 272        |
|               |        |    |        |     | <b>Answered</b> | <b>272</b> |
|               |        |    |        |     | <b>Skipped</b>  | <b>1</b>   |

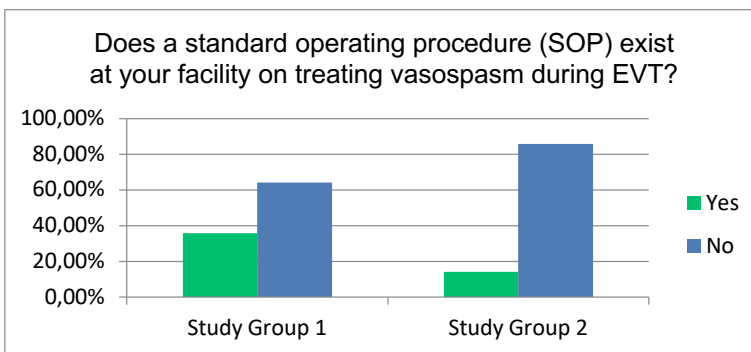

Supplement: inline-supplementary-material-2 [file inline-supplementary-material-2.pdf]
